# Supplementary material for: Gene expression in African Americans, Puerto Ricans and Mexican Americans reveals ancestry-specific patterns of genetic architecture
Source: Springer Nature journal article supplement (doi:10.1038/s41588-023-01377-z), 2023-05-25
Supplement: MOESM1 [file 41588_2023_1377_MOESM1_ESM.pdf]

# Gene expression in African Americans, Puerto Ricans and Mexican Americans reveals ancestry-specific patterns of genetic architecture

---

In the format provided by the  
authors and unedited

**Supplementary Figure 1: Distribution of global genetic ancestry in within self-identified race/ethnicity groups.** Each panel visualizes the number of individuals within deciles of global genetic ancestry for European (EUR), African (AFR), and Indigenous American (IAM) ancestry. Stacked bar plots show the number of individuals from self-reported race/ethnicity groups within each ancestry decile. Vertical lines show the thresholds for deriving ancestry-based groups for eQTL comparisons. Figure created with BioRender.com

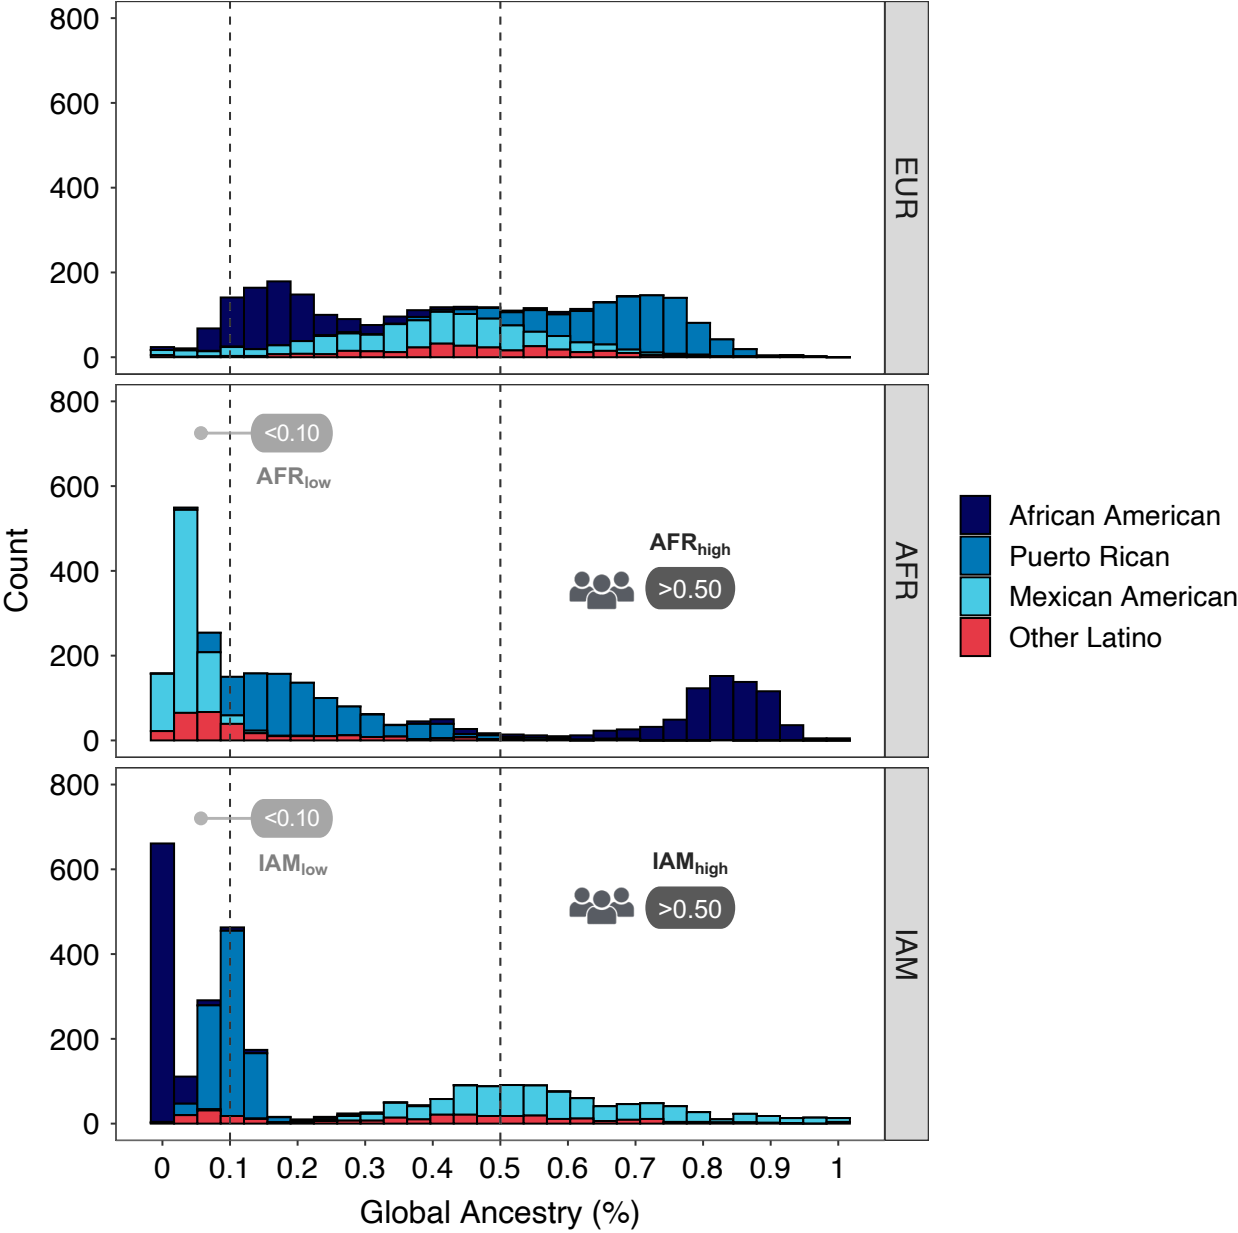

**Supplementary Figure 2: Association of global and local ancestry with gene expression levels.**

Stepwise local regression was used to identify genes for which global and/or local ancestry had a significant ( $FDR < 0.05$ ) effect on transcript levels., the variance in transcript levels accounted for by **a**, African and **b**, Indigenous American ancestry. In each panel, inset plots visualize the 0-15% range on the y-axis, without outliers while the full range percentage variance explained are shown in the top panel. Red box highlights the zoomed region as shown in the bottom panel. Analyses are stratified by self-reported race/ethnicity: African American (AA), Puerto Rican (PR), and Mexican American (MX).

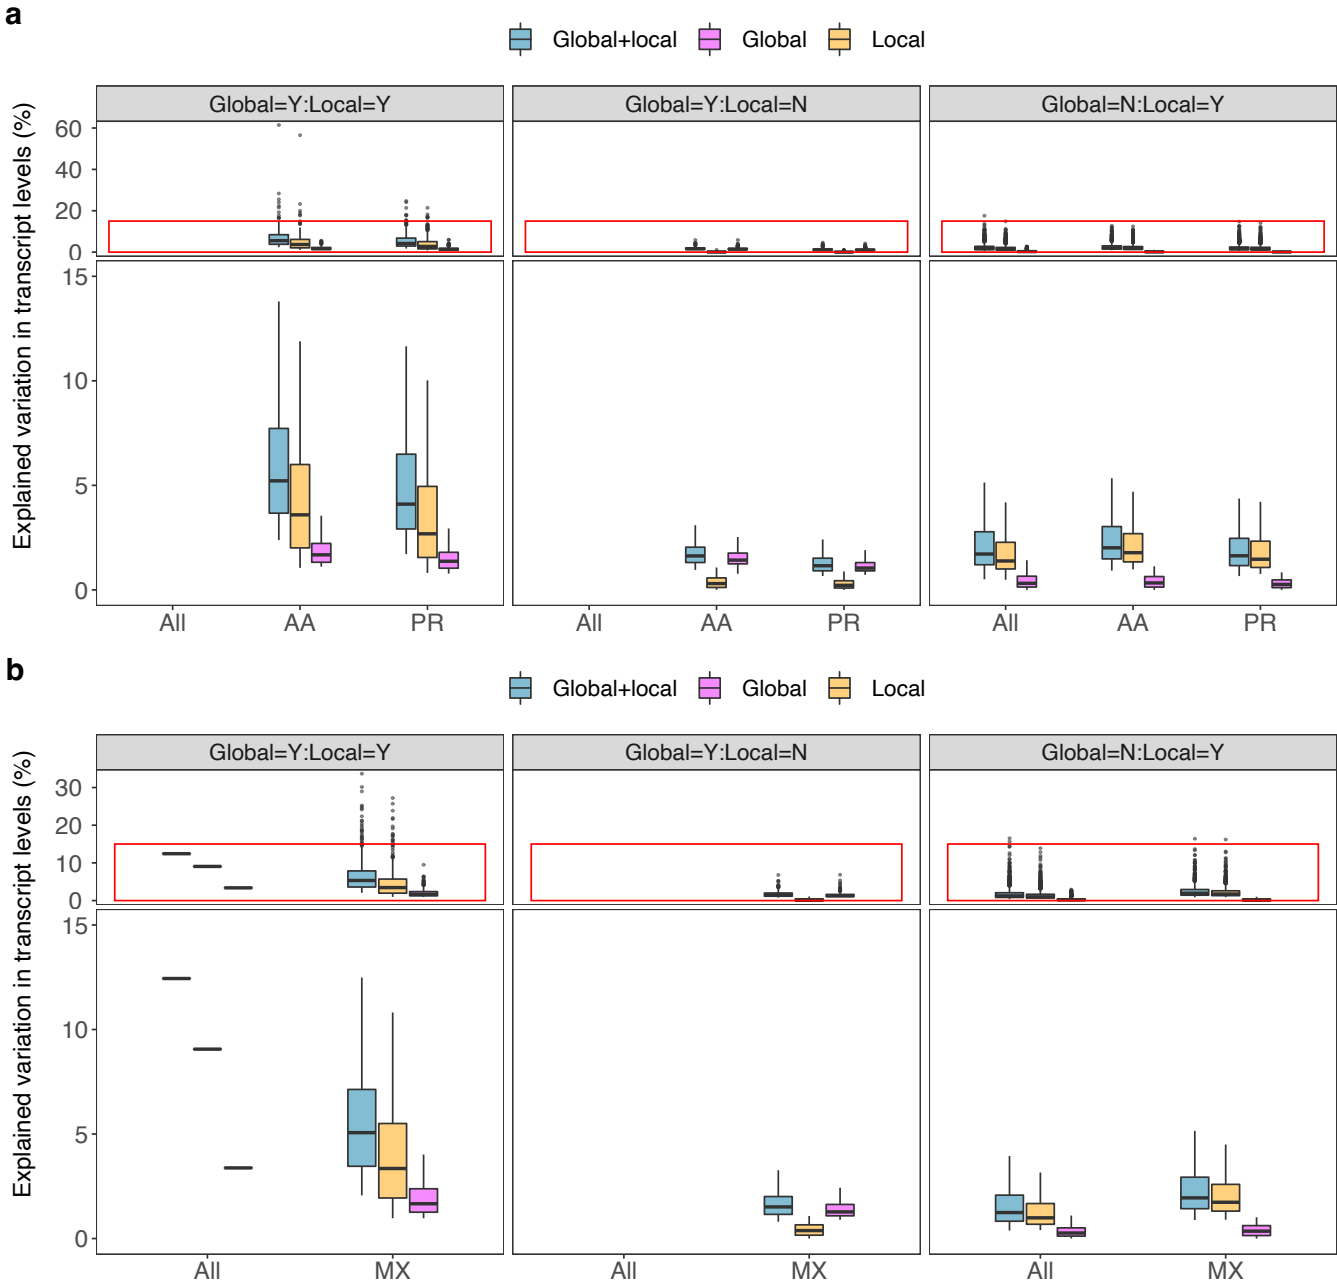

**Supplementary Figure 3: Overlap of eGenes between self-identified race/ethnicity groups.** Venn diagrams show the overlap in genes with at least one statistically significant eQTL (eGenes) between GALA/SAGE participants. Overlap was tabulated for all genes and for protein-coding genes only.

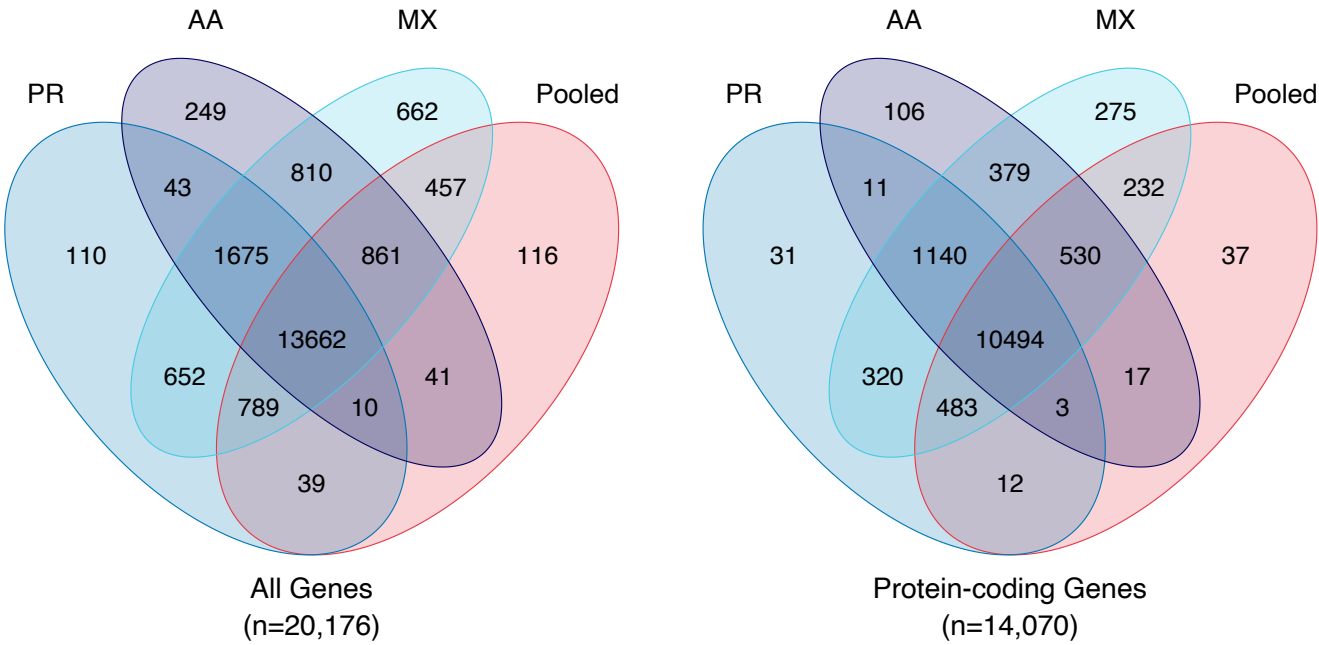

**Supplementary Figure 4: Cross validation  $R^2$  of transcriptome prediction models.** Cross validation (CV)  $R^2$  for each gene is overlaid on the *cis*-heritability ( $h^2$ ), indicated by the black point, with 95% confidence intervals as gray lines. Elastic net transcriptome prediction models were generated using the PredictDB analytic pipeline. Genes are sorted by increasing  $h^2$  values. **a-d**, Prediction model performance is shown for models trained in African American, Puerto Rican, Mexican American participants, and the pooled sample that also included individuals self-identified as Other Latino.

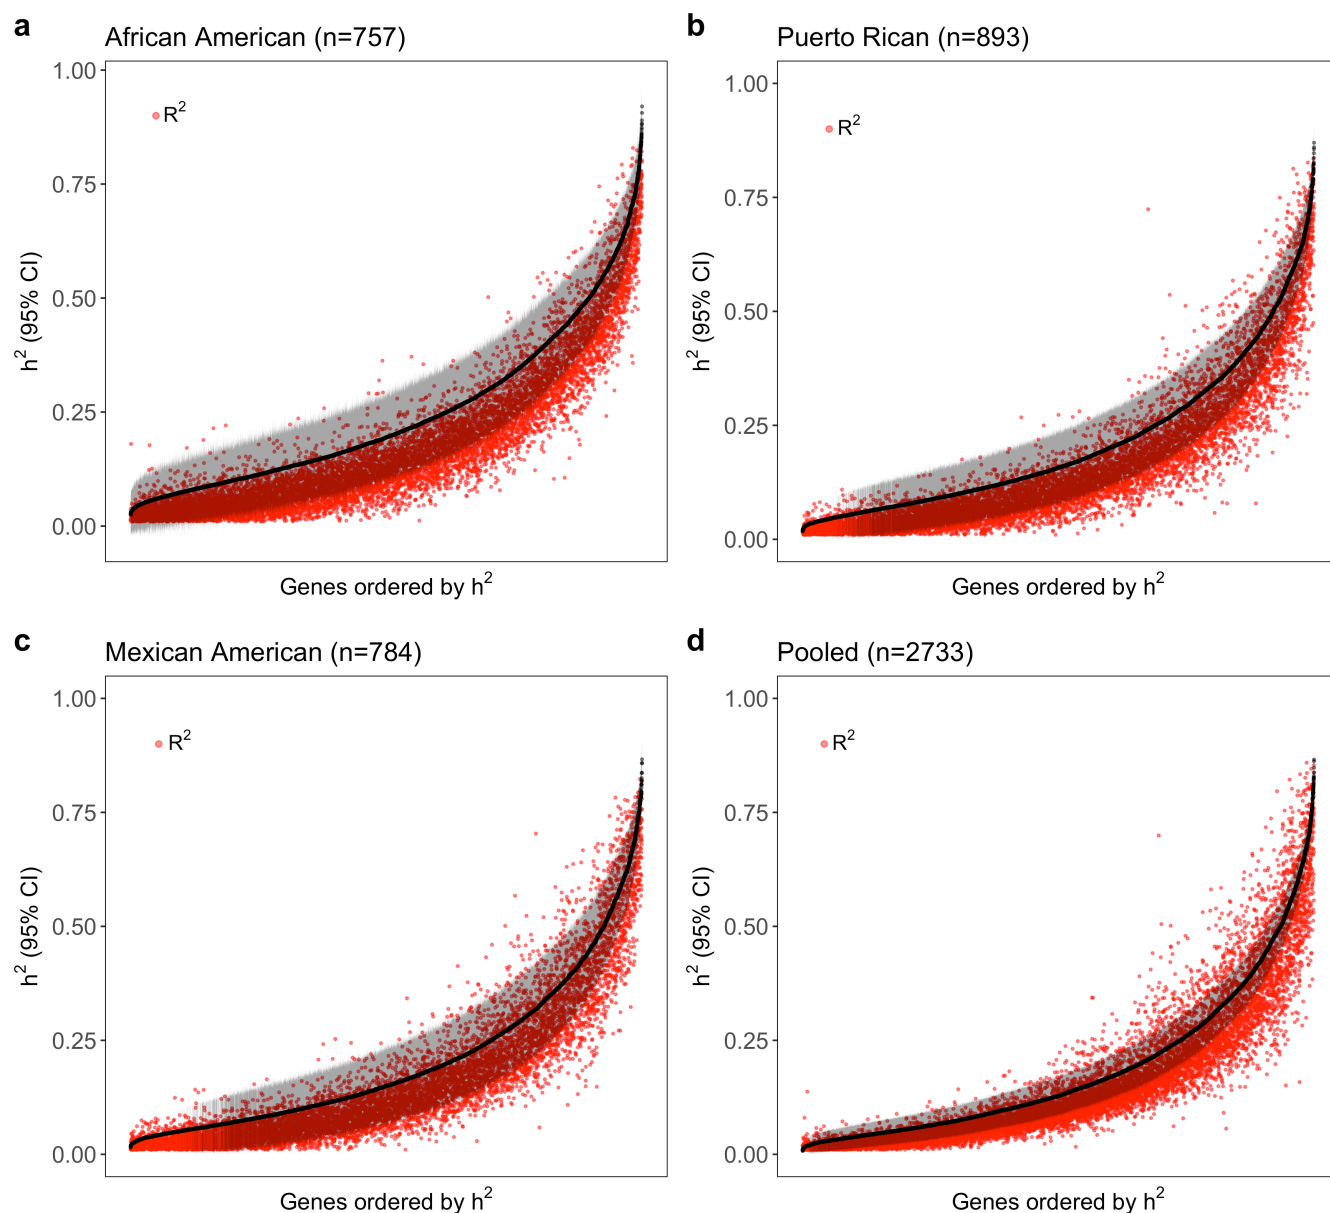

**Supplementary Figure 5: Out of sample validation of TWAS models in the SAPHIRE.** **a**, Admixture plots for the SAPHIRE validation study and each of the training samples used to develop the TWAS models. **b**, Correlations between predicted and observed gene expression levels are shown for 5254 genes with prediction models available in GTEx and GALA/SAGE. For each set of TWAS models, violin plots visualize the distribution of correlation coefficients, with circles indicating the median correlation, and crossbars showing the interquartile range (IQR) from the 25<sup>th</sup> to the 75<sup>th</sup> percentile. Two-sided p-values are based on the Wilcoxon test.

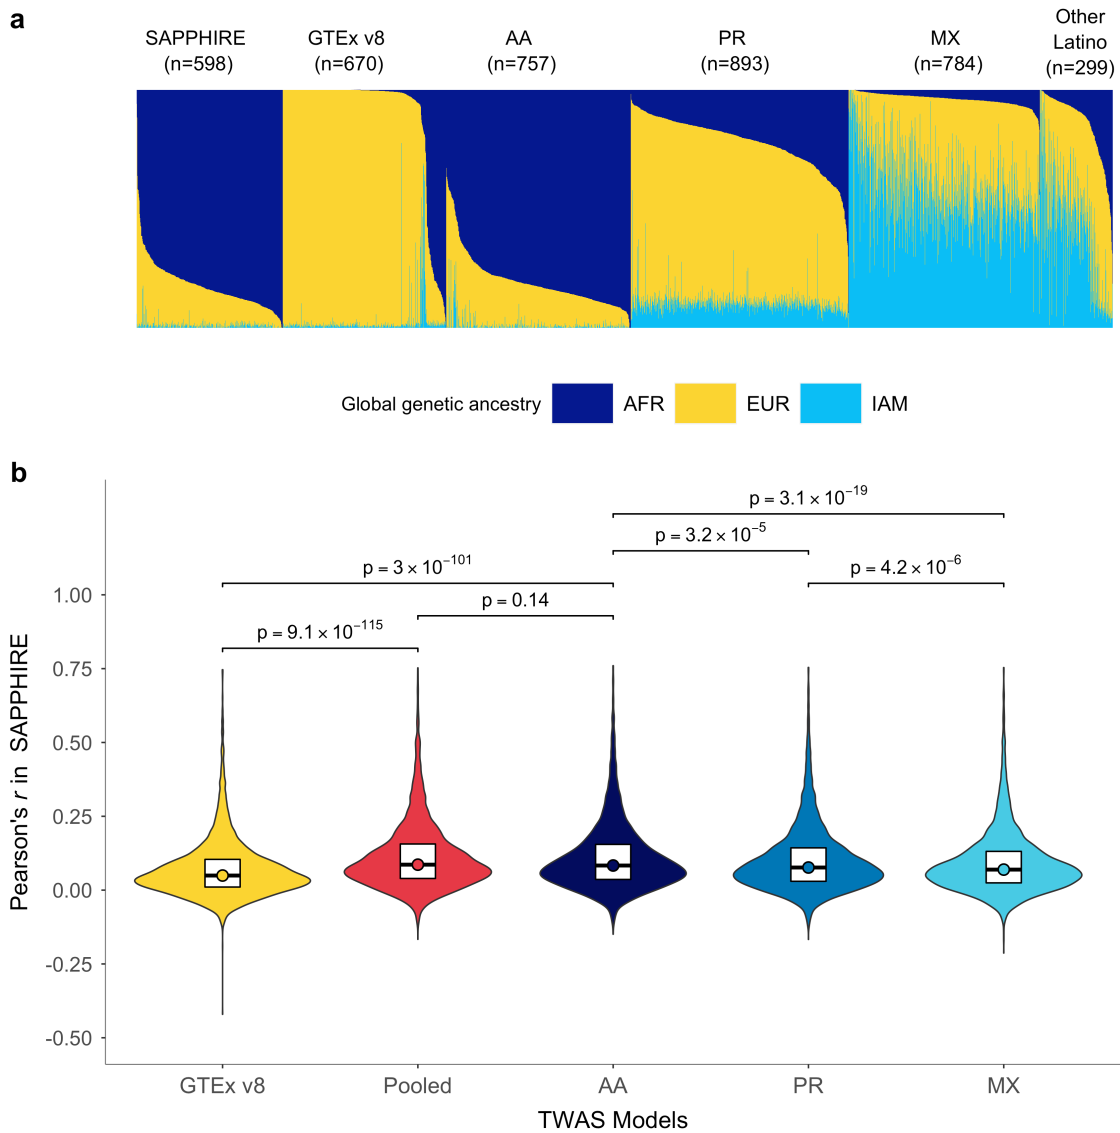

|                       |                       | GTEx v8       | Pooled        | AA            | PR            | MX            |
|-----------------------|-----------------------|---------------|---------------|---------------|---------------|---------------|
| Intersection of genes |                       | 5254          | 5254          | 5254          | 5254          | 5254          |
| Validation:           | nGene                 | 4224          | 4739          | 4713          | 4646          | 4544          |
|                       | Pearson's $r > 0$ (%) | (80.4)        | (90.2)        | (0.897)       | (88.4)        | (86.5)        |
| Pearson's $r$         | Mean                  | 0.070         | 0.113         | 0.111         | 0.102         | 0.092         |
|                       | Median                | 0.049         | 0.086         | 0.083         | 0.077         | 0.069         |
|                       | IQR                   | 0.010 - 0.104 | 0.039 - 0.156 | 0.036 - 0.155 | 0.030 - 0.143 | 0.025 - 0.131 |

**Supplementary Figure 6: Conditional TWAS of neutrophil counts in UK Biobank.** Given the extensive LD in the region around the *ACKR1* (atypical chemokine receptor) gene, that is the basis of the Duffy blood group system, we compared results when applying GALA/SAGE African American TWAS models to marginal GWAS results and GWAS conditioned on rs2814778, the Duffy null variant responsible for constitutively lower neutrophil levels. GWAS results for neutrophil counts are based on 6115 African ancestry subjects from the UK Biobank. Genes with  $FDR < 0.05$  are highlighted in orange. The dotted line corresponds to the Bonferroni adjusted p-value threshold of  $4.5 \times 10^{-5} = 0.05/1120$  genes tested. Both FDR and Bonferroni only account for local multiple comparisons within chromosome 1.

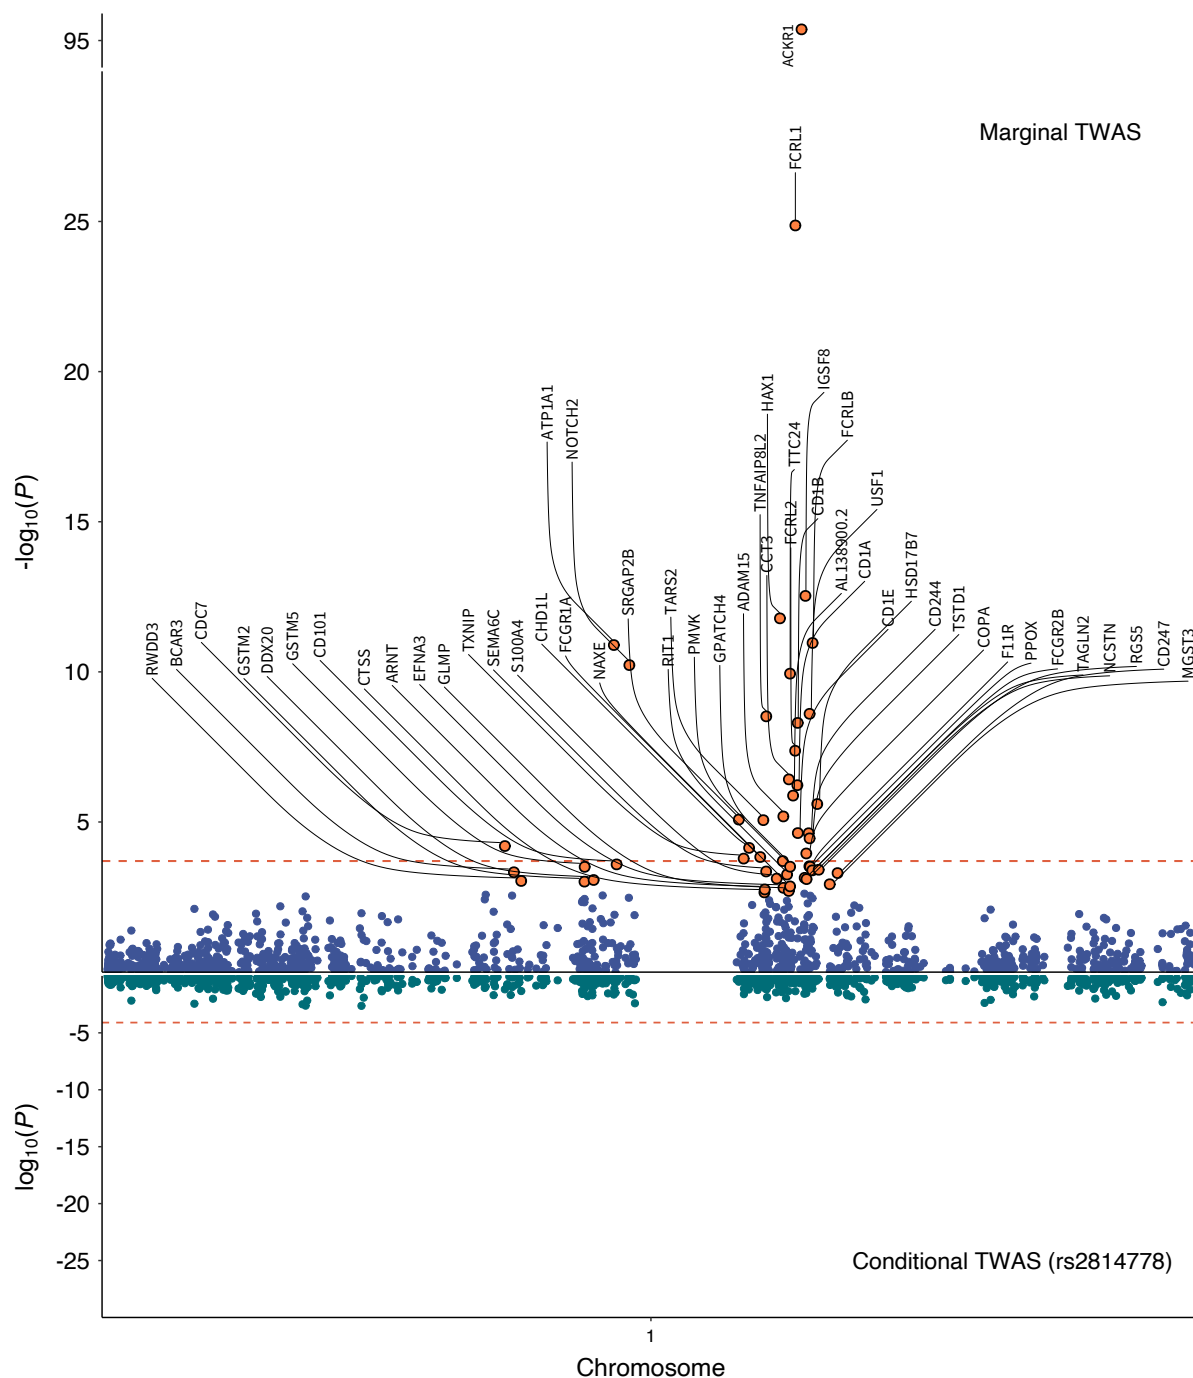

**Supplementary Figure 7: Selection of PEER factors for eQTL analysis.** The number of **a**, eQTLs and **b**, eGenes detected as a function of PEER factors included as covariates in analyses stratified by self-reported race/ethnicity groups: African Americans (AA), Puerto Ricans (PR), and Mexican Americans (MX). The number of **c**, eQTLs and **d**, eGenes detected as a function of PEER factors included as covariates in analyses stratified genetic ancestry groups: >50% African ancestry (AFR<sub>high</sub>), <10% African ancestry (AFR<sub>low</sub>), >50% Indigenous American ancestry (IAM<sub>high</sub>), <10% Indigenous American ancestry (IAM<sub>low</sub>). Vertical dashed lines indicate the number of PEER factors selected for the final analysis with the goal of maximizing eQTL discovery.

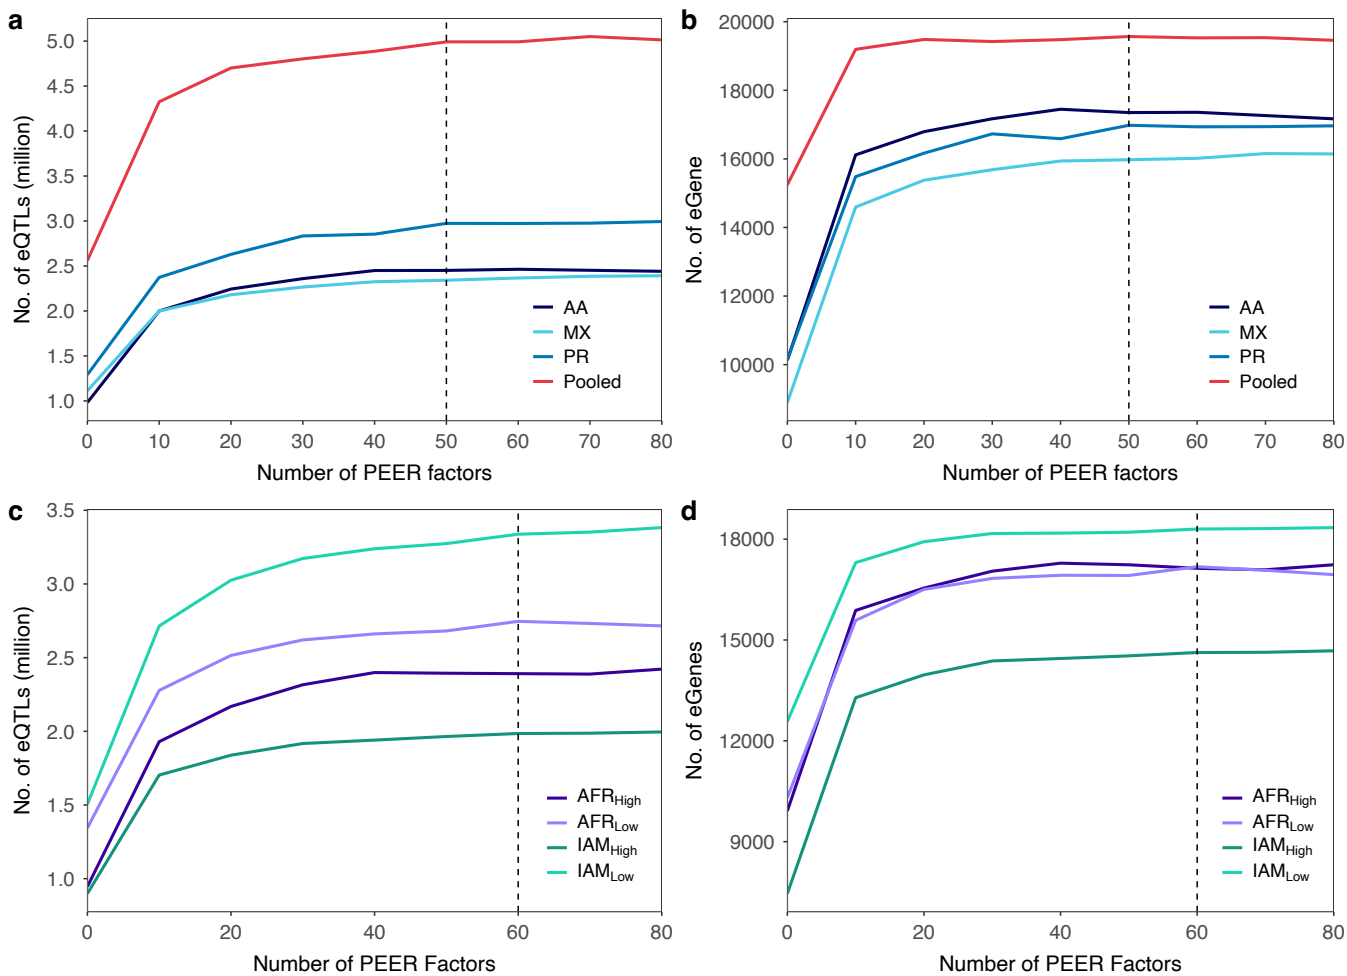



**Supplementary Table 1: Study population.** The total number of individuals with whole genome and RNA sequencing data from the Genes-environments and Admixture in Latino Americans (GALA II) and the Study of African Americans, Asthma, Genes, and Environments (SAGE) included in the present analysis. Participant groups based on race/ethnicity are mutually exclusive. Groupings based on genetic ancestry are non-overlapping only within African (AFR) or Indigenous American (IAM) strata. For example, a subject with 85% AFR ancestry will be included in the AFR<sub>high</sub> analysis and may also be included in the IAM<sub>low</sub> analysis, if they meet the <10% IAM ancestry criterion.

|                                    | Participant Groups              | Sample Size |
|------------------------------------|---------------------------------|-------------|
| Self-identified<br>race/ ethnicity | African American                | 757         |
|                                    | Puerto Rican                    | 893         |
|                                    | Mexican American                | 784         |
|                                    | Other Latino                    | 299         |
|                                    | Total/Pooled                    | 2733        |
| Global genetic<br>ancestry         | AFR <sub>high</sub> (AFR > 50%) | 721         |
|                                    | AFR <sub>low</sub> (AFR < 10%)  | 1011        |
|                                    | AFR sub-total                   | 1732        |
|                                    | IAM <sub>high</sub> (IAM > 50%) | 610         |
|                                    | IAM <sub>low</sub> (IAM < 10%)  | 1257        |
|                                    | IAM sub-total                   | 1867        |

**Supplementary Table 2: *Cis*-heritability ( $h^2$ ) and genetic variance ( $V_G$ ) of gene expression stratified by self-identified race/ethnicity.** GCTA analyses were restricted to common variants, with MAF  $\geq 0.01$  in each population, within 1MB flanking regions of the transcription start site. Estimates of  $h^2$  and  $V_G$  are summarized across the intersection of genes (nGene) with GCTA results available in all populations. All p-values are two-sided.

|                                                     | <b>African American<br/>(n=757)</b> | <b>Puerto Rican<br/>(n=893)</b> | <b>Mexican<br/>American (n=784)</b> | <b>Pooled<br/>(n=2733)</b> |
|-----------------------------------------------------|-------------------------------------|---------------------------------|-------------------------------------|----------------------------|
| nGene                                               | 17,657                              | 17,657                          | 17,657                              | 17,657                     |
| $h^2$                                               |                                     |                                 |                                     |                            |
| Mean                                                | 0.170                               | 0.142                           | 0.130                               | 0.148                      |
| Median                                              | 0.111                               | 0.080                           | 0.066                               | 0.087                      |
| IQR                                                 | 0.039 – 0.252                       | 0.026 – 0.204                   | 0.019 – 0.184                       | 0.030 – 0.211              |
| $V_G$                                               |                                     |                                 |                                     |                            |
| Mean                                                | 0.059                               | 0.052                           | 0.044                               | 0.054                      |
| Median                                              | 0.025                               | 0.020                           | 0.014                               | 0.020                      |
| IQR                                                 | 0.006 – 0.073                       | 0.005 – 0.060                   | 0.003 – 0.047                       | 0.006 – 0.062              |
| Mean global ancestry proportion                     |                                     |                                 |                                     |                            |
| AFR                                                 | 0.80                                | 0.22                            | 0.04                                | 0.32                       |
| IAM                                                 | 0.01                                | 0.10                            | 0.57                                | 0.24                       |
| Wilcoxon p-value of $h^2$ comparison between groups |                                     |                                 |                                     |                            |
| AA                                                  | -                                   | $1.7 \times 10^{-69}$           | $1.8 \times 10^{-160}$              | $1.9 \times 10^{-34}$      |
| PR                                                  | -                                   | -                               | $3.1 \times 10^{-24}$               | $2.1 \times 10^{-10}$      |
| MX                                                  | -                                   | -                               | -                                   | $1.8 \times 10^{-64}$      |
| Wilcoxon p-value of $V_G$ comparison between groups |                                     |                                 |                                     |                            |
| AA                                                  | -                                   | $4.3 \times 10^{-23}$           | $2.3 \times 10^{-148}$              | -                          |
| PR                                                  | -                                   | -                               | $2.0 \times 10^{-62}$               | -                          |
| MX                                                  | -                                   | -                               | -                                   | -                          |

#### Abbreviations

|        |                                                                                         |
|--------|-----------------------------------------------------------------------------------------|
| AFR    | African ancestry                                                                        |
| IAM    | Indigenous American ancestry                                                            |
| IQR    | Interquartile range extending from the 25 <sup>th</sup> to 75 <sup>th</sup> percentiles |
| Pooled | Analysis includes AA, PR, MX, and other Latinos                                         |

**Supplementary Table 3: *Cis*-heritability ( $h^2$ ) and genetic variance ( $V_G$ ) of gene expression stratified by global genetic ancestry.** GCTA analyses were restricted to common variants, with MAF  $\geq 0.01$  in each population, within 1MB flanking regions of the transcription start site. Individuals were stratified based on proportion. Individuals with  $>50\%$  global genetic African ancestry ( $AFR_{high}$ ) were compared to those with  $<10\%$  ( $AFR_{low}$ ). Individuals with  $>50\%$  global genetic Indigenous American ancestry ( $IAM_{high}$ ) were compared to those with  $<10\%$  ( $IAM_{low}$ ). Estimates of  $h^2$  and  $V_G$  are summarized across the intersection of genes (nGene) with GCTA results available in all genetic ancestry groups. All p-values are two-sided.

|                                                     | <b><math>AFR_{high}</math> (n=721)</b> | <b><math>AFR_{low}</math> (n=1011)</b> | <b><math>IAM_{high}</math> (n=610)</b> | <b><math>IAM_{low}</math> (n=1257)</b> |
|-----------------------------------------------------|----------------------------------------|----------------------------------------|----------------------------------------|----------------------------------------|
| nGene                                               | 18,725                                 | 18,725                                 | 18,725                                 | 18,725                                 |
| $h^2$                                               |                                        |                                        |                                        |                                        |
| Mean                                                | 0.167                                  | 0.129                                  | 0.123                                  | 0.152                                  |
| Median                                              | 0.107                                  | 0.065                                  | 0.062                                  | 0.091                                  |
| IQR                                                 | 0.037 – 0.247                          | 0.019 – 0.182                          | 0.016 – 0.176                          | 0.031 – 0.221                          |
| $V_G$                                               |                                        |                                        |                                        |                                        |
| Mean                                                | 0.058                                  | 0.046                                  | 0.041                                  | 0.055                                  |
| Median                                              | 0.024                                  | 0.014                                  | 0.013                                  | 0.022                                  |
| IQR                                                 | 0.006 – 0.072                          | 0.003 – 0.048                          | 0.002 – 0.045                          | 0.006 – 0.066                          |
| Mean global ancestry proportion                     |                                        |                                        |                                        |                                        |
| AFR                                                 | 0.82                                   | 0.04                                   | 0.04                                   | 0.58                                   |
| IAM                                                 | 0.01                                   | 0.54                                   | 0.67                                   | 0.04                                   |
| Wilcoxon p-value of $h^2$ comparison between groups |                                        |                                        |                                        |                                        |
| $AFR_{high}$                                        | -                                      | $4.2 \times 10^{-140}$                 | -                                      | -                                      |
| $IAM_{high}$                                        | -                                      | -                                      | -                                      | $5.8 \times 10^{-120}$                 |
| Wilcoxon p-value of $V_G$ comparison between groups |                                        |                                        |                                        |                                        |
| $AFR_{high}$                                        | -                                      | $8.0 \times 10^{-114}$                 | -                                      | -                                      |
| $IAM_{high}$                                        | -                                      | -                                      | -                                      | $8.3 \times 10^{-173}$                 |

#### Abbreviations

|        |                                                                                         |
|--------|-----------------------------------------------------------------------------------------|
| AFR    | African ancestry                                                                        |
| IAM    | Indigenous American ancestry                                                            |
| IQR    | Interquartile range extending from the 25 <sup>th</sup> to 75 <sup>th</sup> percentiles |
| Pooled | Analysis also includes participants self-identified as Other Latino                     |

**Supplementary Table 4: Comparison of  $V_G$  stratified by local genetic ancestry.** GCTA analyses were restricted to common variants, with  $MAF \geq 0.01$  in each population, within 1MB flanking regions of the transcription start site. For each gene, individuals were classified into local ancestry groups, L1 and L2, based on the ancestry at the transcription start site. The number of genes (nGene) for which GCTA models successfully converged and produced reliable heritability ( $h^2$ ) and genetic variance ( $V_G$ ) estimates is reported for each analysis. Genes were not filtered based on statistically significant heritability. Wilcoxon p-values comparing  $h^2$  and  $V_G$  between L1 and L2 are two-sided.

| Population       | Local ancestry group |        |         |         | Mean $h^2$ |       | P-value               | Mean $V_G$ |       | P-value               |
|------------------|----------------------|--------|---------|---------|------------|-------|-----------------------|------------|-------|-----------------------|
|                  | N                    | nGene  | L1      | L2      | L1         | L2    |                       | L1         | L2    |                       |
| Pooled           | 516                  | 17,866 | AFR/AFR | AFR/EUR | 0.153      | 0.142 | $1.4 \times 10^{-14}$ | 0.053      | 0.049 | $2.0 \times 10^{-7}$  |
| African American | 202                  | 19,224 | AFR/AFR | AFR/EUR | 0.143      | 0.137 | $6.2 \times 10^{-5}$  | 0.041      | 0.039 | $5.7 \times 10^{-5}$  |
| Puerto Rican     | 242                  | 18,570 | AFR/EUR | EUR/EUR | 0.129      | 0.108 | $1.8 \times 10^{-32}$ | 0.041      | 0.033 | $1.4 \times 10^{-28}$ |
| Pooled           | 359                  | 10,566 | IAM/IAM | IAM/EUR | 0.108      | 0.119 | $1.6 \times 10^{-7}$  | 0.033      | 0.038 | $1.6 \times 10^{-8}$  |
| Mexican American | 262                  | 18,194 | IAM/IAM | IAM/EUR | 0.101      | 0.117 | $3.4 \times 10^{-14}$ | 0.029      | 0.035 | $7.7 \times 10^{-11}$ |

#### Abbreviations

|        |                                                                     |
|--------|---------------------------------------------------------------------|
| AFR    | African ancestry                                                    |
| IAM    | Indigenous American ancestry                                        |
| Pooled | Analysis also includes participants self-identified as Other Latino |

**Supplementary Table 5: *Cis*-heritability ( $h^2$ ) estimated using LDAK-Thin.** Analyses were restricted to common variants, with MAF  $\geq 0.01$  in each population, within 1MB flanking regions of the transcription start site. Individuals were stratified based on proportion. Individuals with  $>50\%$  global genetic African ancestry ( $AFR_{high}$ ) were compared to those with  $<10\%$  ( $AFR_{low}$ ). Individuals with  $>50\%$  global genetic Indigenous American ancestry ( $IAM_{high}$ ) were compared to those with  $<10\%$  ( $IAM_{low}$ ). Estimates of  $h^2$  are summarized across the intersection of genes (nGene) with LDAK results available in all genetic ancestry groups. All p-values are two-sided.

|                                                     | <b>African American<br/>(n=757)</b>    | <b>Puerto Rican<br/>(n=893)</b>        | <b>Mexican American<br/>(n=784)</b>    | <b>Pooled<br/>(n=2733)</b>             |
|-----------------------------------------------------|----------------------------------------|----------------------------------------|----------------------------------------|----------------------------------------|
| nGene                                               | 18,261                                 | 18,261                                 | 18,261                                 | 18,261                                 |
| $h^2$                                               |                                        |                                        |                                        |                                        |
| Mean                                                | 0.157                                  | 0.136                                  | 0.125                                  | 0.146                                  |
| Median                                              | 0.094                                  | 0.071                                  | 0.059                                  | 0.081                                  |
| IQR                                                 | 0.029 – 0.234                          | 0.020 – 0.194                          | 0.016 – 0.176                          | 0.024 – 0.213                          |
| Wilcoxon p-value of $h^2$ comparison between groups |                                        |                                        |                                        |                                        |
| AA                                                  | -                                      | $2.6 \times 10^{-43}$                  | $1.8 \times 10^{-104}$                 | $3.0 \times 10^{-9}$                   |
| PR                                                  | -                                      | -                                      | $1.9 \times 10^{-16}$                  | $2.7 \times 10^{-17}$                  |
| MX                                                  | -                                      | -                                      | -                                      | $6.1 \times 10^{-65}$                  |
|                                                     | <b><math>AFR_{high}</math> (n=721)</b> | <b><math>AFR_{low}</math> (n=1011)</b> | <b><math>IAM_{high}</math> (n=610)</b> | <b><math>IAM_{low}</math> (n=1257)</b> |
| nGene                                               | 18,475                                 | 18,475                                 | 18,475                                 | 18,475                                 |
| $h^2$                                               |                                        |                                        |                                        |                                        |
| Mean                                                | 0.166                                  | 0.132                                  | 0.125                                  | 0.157                                  |
| Median                                              | 0.104                                  | 0.066                                  | 0.062                                  | 0.093                                  |
| IQR                                                 | 0.035 – 0.246                          | 0.020 – 0.187                          | 0.017 – 0.179                          | 0.032 – 0.229                          |
| Wilcoxon p-value of $h^2$ comparison between groups |                                        |                                        |                                        |                                        |
| $AFR_{high}$                                        | -                                      | $1.9 \times 10^{-117}$                 |                                        |                                        |
| $IAM_{high}$                                        | -                                      | $1.0 \times 10^{-122}$                 |                                        |                                        |

#### Abbreviations

|        |                                                                                         |
|--------|-----------------------------------------------------------------------------------------|
| AFR    | African ancestry                                                                        |
| IAM    | Indigenous American ancestry                                                            |
| IQR    | Interquartile range extending from the 25 <sup>th</sup> to 75 <sup>th</sup> percentiles |
| Pooled | Analysis also includes participants self-identified as Other Latino                     |

**Supplementary Table 6: Number of heritable genes significantly associated with global and local ancestry.** Analyses were restricted to heritable and autosomal genes with local ancestry estimates, and

populations with sufficient variability for a given ancestry comparison. The number of association genes is tabulated for all combinations of global and local ancestry associations. For example, group  $AFR_{G=Y,L=Y}$  (global ancestry=Y and local ancestry=Y) includes genes that are associated with both global and local African ancestry at FDR < 0.05 level.

| Ancestry Associations            |                 | FDR < 0.05 |       | African American (n=757) |      | Puerto Rican (n=893) |      | Mexican American (n=784) |      |
|----------------------------------|-----------------|------------|-------|--------------------------|------|----------------------|------|--------------------------|------|
|                                  |                 | Global     | Local | nGene                    | %    | nGene                | %    | nGene                    | %    |
| AFR                              | $AFR_{G=Y,L=Y}$ | Yes        | Yes   | 204                      | 1.5  | 334                  | 2.5  | -                        | -    |
|                                  | $AFR_{G=Y,L=N}$ | Yes        | No    | 326                      | 2.4  | 589                  | 4.5  | -                        | -    |
|                                  | $AFR_{G=N,L=Y}$ | No         | Yes   | 1,201                    | 8.9  | 1,443                | 10.9 | -                        | -    |
|                                  | $AFR_{G=N,L=N}$ | No         | No    | 11,833                   | 87.2 | 10,856               | 82.1 | -                        | -    |
| IAM                              | $IAM_{G=Y,L=Y}$ | Yes        | Yes   | -                        | -    | -                    | -    | 389                      | 3.1  |
|                                  | $IAM_{G=Y,L=N}$ | Yes        | No    | -                        | -    | -                    | -    | 353                      | 2.8  |
|                                  | $IAM_{G=N,L=Y}$ | No         | Yes   | -                        | -    | -                    | -    | 1,228                    | 9.8  |
|                                  | $IAM_{G=N,L=N}$ | No         | No    | -                        | -    | -                    | -    | 10,559                   | 84.3 |
| No. of heritable autosomal genes |                 |            |       | 13,596                   | -    | 13,260               | -    | 12,562                   | -    |
| No. of genes analyzed            |                 |            |       | 13,564                   | -    | 13,222               | -    | 12,529                   | -    |

#### Abbreviations

|        |                                                                                         |
|--------|-----------------------------------------------------------------------------------------|
| AFR    | African ancestry                                                                        |
| IAM    | Indigenous American ancestry                                                            |
| IQR    | Interquartile range extending from the 25 <sup>th</sup> to 75 <sup>th</sup> percentiles |
| Pooled | Analysis also includes participants self-identified as Other Latino                     |

**Supplementary Table 7: eQTLs and eGenes identified from each population.** Results of FastQTL analyses conducted in GALA II / SAGE participants grouped based on self-identified race/ethnicity and genetic ancestry. Individuals were stratified based on proportion. Individuals with >50% global genetic African ancestry (AFR<sub>high</sub>) were compared to those with <10% (AFR<sub>low</sub>). Individuals with >50% global genetic Indigenous American ancestry (IAM<sub>high</sub>) were compared to those with <10% (IAM<sub>low</sub>).

| Populations      | N    | Number of eQTLs | Number of eQTL-gene pairs | Number of eGenes |
|------------------|------|-----------------|---------------------------|------------------|
| Pooled (Total)   | 2733 | 4,984,220       | 13,402,207                | 19,567           |
| African American | 757  | 2,448,802       | 4,399,353                 | 17,336           |
| Puerto Rican     | 893  | 2,970,694       | 6,032,429                 | 16,975           |
| Mexican American | 784  | 2,333,522       | 5,232,074                 | 15,938           |

Genetic ancestry groups

|                     |      |           |           |        |
|---------------------|------|-----------|-----------|--------|
| AFR <sub>high</sub> | 721  | 2,389,968 | 4,260,212 | 17,123 |
| AFR <sub>low</sub>  | 1011 | 2,736,501 | 6,601,500 | 17,146 |
| IAM <sub>high</sub> | 610  | 1,979,263 | 4,180,137 | 14,579 |
| IAM <sub>low</sub>  | 1257 | 3,334,768 | 6,831,948 | 18,297 |

Genetic ancestry groups (equal sample size)

|                     |     |           |           |        |
|---------------------|-----|-----------|-----------|--------|
| AFR <sub>high</sub> | 600 | 1,975,039 | 3,339,661 | 16,110 |
| AFR <sub>low</sub>  |     | 1,888,196 | 3,880,554 | 14,344 |
| IAM <sub>high</sub> |     | 1,953,964 | 4,104,553 | 14,419 |
| IAM <sub>low</sub>  |     | 1,707,612 | 2,841,161 | 14,866 |

Abbreviations

|        |                                                                     |
|--------|---------------------------------------------------------------------|
| AFR    | African ancestry                                                    |
| IAM    | Indigenous American ancestry                                        |
| Pooled | Analysis also includes participants self-identified as Other Latino |

**Supplementary Table 8: Gene pre-filtering for ancestry-specific eQTL analysis.** Significant *cis*-heritability, statistical significance of heritability estimates was determined using LRT p-value provided by GCTA. A total of 9609 and 8515 genes were used as the input to the ancestry-specific eQTL classification pipeline.

|                                                                                                | <b>AFR</b> | <b>IAM</b> |
|------------------------------------------------------------------------------------------------|------------|------------|
| Input number of genes                                                                          | 20,135     | 20,135     |
| Protein coding genes (autosomal)                                                               | 13,535     | 13,535     |
| Significant <i>cis</i> -heritability in high group (LRT p < 0.05)                              | 10,225     | 8,889      |
| eGene in high ancestry group (>50% AFR or IAM)                                                 | 10,077     | 8,594      |
| 95% credible sets generated using CAVIAR in both high and low (<10% AFR or IAM) ancestry group | 9,609      | 8,515      |

#### Abbreviations

|     |                              |
|-----|------------------------------|
| AFR | African ancestry             |
| IAM | Indigenous American ancestry |



**Supplementary Table 9: Classification of ancestry-specific eQTLs (anc-eQTLs) using 50% global ancestry cutoff.** Analyses were restricted to heritable genes described in Supplementary Table 8. Comparisons were conducted using >50% as the cut-off for AFR<sub>high</sub> and IAM<sub>high</sub> groups. Tier 1 represents the most ancestry-specific eQTL class, followed by Tier 2 anc-eQTLs. Tier 3 eQTLs were detected within overlapping 95% credible sets that are shared between ancestry groups and represent the least ancestry-specific class.

|                                               | AFR <sub>high</sub> (n=721) vs. AFR <sub>low</sub> (n=1011) |             |                                        | IAM <sub>high</sub> (n=610) vs. IAM <sub>low</sub> (n=1257) |            |                                        |
|-----------------------------------------------|-------------------------------------------------------------|-------------|----------------------------------------|-------------------------------------------------------------|------------|----------------------------------------|
|                                               | nGene                                                       | %           | Gene-eQTL pairs<br>AFR <sub>high</sub> | nGene                                                       | %          | Gene-eQTL pairs<br>IAM <sub>high</sub> |
| Genes analyzed                                | 9609                                                        | 100         | 3,020,690                              | 8515                                                        | 100        | 3,015,261                              |
| No overlap in 95% credible set <sup>1,2</sup> | 4551                                                        | 47.4        | 1,257,678                              | 3160                                                        | 37.1       | 938,278                                |
| Tier 1                                        | 2695                                                        | 28.0        | 41,102                                 | 562                                                         | 6.6        | 3,938                                  |
| PESCA input                                   | 2921                                                        | 30.4        | 41,632                                 | 2999                                                        | 35.2       | 98,149                                 |
| Tier 2                                        | 109                                                         | 1.1         | 112                                    | 33                                                          | 0.4        | 36                                     |
| Overlapping 95% credible set <sup>3</sup>     | 5058                                                        | 52.6        | 1,763,012                              | 5355                                                        | 62.9       | 2,076,983                              |
| Tier 3                                        | 196                                                         | 2.0         | 894                                    | 88                                                          | 1.0        | 420                                    |
| <b>Union of Tiers 1-3</b>                     | <b>2961</b>                                                 | <b>30.8</b> | <b>42,108</b>                          | <b>679</b>                                                  | <b>8.0</b> | <b>4394</b>                            |

<sup>1</sup> Tier 1 eQTLs includes variants that are rare (MAF<0.01) or monomorphic in the low ancestry (<10%) group

<sup>2</sup> Tier 2 eQTLs were identified using fine-mapping using PESCA and include variants with posterior probability (PP<sub>high</sub>)>0.80 of being specific to AFR<sub>high</sub> or IAM<sub>high</sub> and have PP<sub>high</sub>>PP<sub>low</sub>

<sup>3</sup> Tier 3 eQTLs show effect size heterogeneity based on Cochran's Q test (P<sub>Q</sub><0.05/number of genes tested)

#### Abbreviations

AFR African ancestry

IAM Indigenous American ancestry

**Supplementary Table 10: Classification of ancestry-specific eQTLs (anc-eQTLs) using 70% global ancestry as cutoff.** Analyses were restricted to heritable genes described in Supplementary Table 8. Comparisons were conducted using >70% as the cut-off for AFR<sub>high</sub> and IAM<sub>high</sub> groups. Tier 1 represents the most ancestry-specific eQTL class, followed by Tier 2 anc-eQTLs. Tier 3 eQTLs were detected within overlapping 95% credible sets that are shared between ancestry groups and represent the least ancestry-specific class.

|                                               | AFR <sub>high</sub> (n=653) vs. AFR <sub>low</sub> (n=1011) |             |                                        | IAM <sub>high</sub> (n=212) vs. IAM <sub>low</sub> (n=1251) |            |                                        |
|-----------------------------------------------|-------------------------------------------------------------|-------------|----------------------------------------|-------------------------------------------------------------|------------|----------------------------------------|
|                                               | nGene                                                       | %           | Gene-eQTL pairs<br>AFR <sub>high</sub> | nGene                                                       | %          | Gene-eQTL pairs<br>IAM <sub>high</sub> |
| Genes analyzed                                | 9267                                                        | 100         | 2,653,736                              | 4587                                                        | 100        | 783,676                                |
| No overlap in 95% credible set <sup>1,2</sup> | 4405                                                        | 45.8        | 1,116,628                              | 1726                                                        | 20.3       | 204,927                                |
| Tier 1                                        | 2620                                                        | 27.3        | 39,300                                 | 280                                                         | 3.3        | 2,263                                  |
| Tier 2                                        | 111                                                         | 1.2         | 111                                    | 5                                                           | 0.1        | 5                                      |
| Overlapping 95% credible set <sup>3</sup>     | 4862                                                        | 50.6        | 1,537,018                              | 2861                                                        | 33.6       | 578,749                                |
| Tier 3                                        | 1                                                           | <0.001      | 1                                      | 0                                                           | 0          | 0                                      |
| <b>Union of Tiers 1-3</b>                     | <b>2701</b>                                                 | <b>28.1</b> | <b>39,412</b>                          | <b>284</b>                                                  | <b>3.3</b> | <b>2268</b>                            |

<sup>1</sup> Tier 1 eQTLs includes variants that are rare (MAF<0.01) or monomorphic in the low ancestry (<10%) group

<sup>2</sup> Tier 2 eQTLs were identified using fine-mapping using PESCA and include variants with posterior probability (PP<sub>high</sub>)>0.80 of being specific to AFR<sub>high</sub> or IAM<sub>high</sub> and have PP<sub>high</sub>>PP<sub>low</sub>

<sup>3</sup> Tier 3 eQTLs show effect size heterogeneity based on Cochran's Q test (P<sub>Q</sub><0.05/number of genes tested)

#### Abbreviations

AFR      African ancestry

IAM      Indigenous American ancestry

**Supplementary Table 13: Trans-eQTL discovery in GALA II/SAGE studies.** Independent trans-eQTLs were identified using LD clumping within 1000 kb windows and  $r^2 < 0.1$  for each gene. Trans-eQTL mapping and LD clumping was performed in groups stratified by self-reported race/ethnicity and genetic ancestry.

| Population            | Sample Size | Trans-eQTLs | Independent trans-eQTLs | eGenes |
|-----------------------|-------------|-------------|-------------------------|--------|
| Pooled (Total)        | 2733        | 9864        | 647                     | 414    |
| African American      | 757         | 329         | 39                      | 33     |
| Puerto Rican          | 893         | 956         | 67                      | 52     |
| Mexican American      | 784         | 1168        | 62                      | 51     |
| AFR <sub>high</sub>   | 721         | 283         | 36                      | 31     |
| Filtered <sup>1</sup> | 721         | 149         | 26                      | 24     |
| IAM <sub>high</sub>   | 610         | 691         | 26                      | 22     |
| Filtered <sup>2</sup> | 610         | 350         | 23                      | 20     |

<sup>1</sup> All trans-eQTLs detected in AFR<sub>low</sub> group were removed

<sup>2</sup> All trans-eQTLs detected in IAM<sub>low</sub> group were removed

#### Abbreviations

AFR African ancestry

IAM Indigenous American ancestry

Pooled Analysis also includes participants self-identified as Other Latino

**Supplementary Table 14: TWAS model performance.** Cross-validation (CV)  $R^2$  of gene expression prediction models generated by PredictDB. Heritability, CV  $R^2$ , and  $V_G$  are summarized across the final set of genes included in the TWAS models.

| Population       | Number of Genes    |                   |                    | $h^2$ | CV $R^2$ | $V_G$ |
|------------------|--------------------|-------------------|--------------------|-------|----------|-------|
|                  | Input <sup>1</sup> | Pass <sup>2</sup> | Final <sup>3</sup> |       |          |       |
| Pooled (Total)   | 14,900             | 11,943            | 11,830             | 0.186 | 0.157    | 0.061 |
| African American | 15,012             | 10,782            | 10,090             | 0.246 | 0.180    | 0.077 |
| Puerto Rican     | 14,756             | 10,039            | 9,611              | 0.212 | 0.163    | 0.071 |
| Mexican American | 14,893             | 9,665             | 9,084              | 0.205 | 0.167    | 0.062 |

<sup>1</sup> The total number of gene models generated from PredictDB

<sup>2</sup> Number of genes that passed the preliminary filters of CV correlation ( $\rho_{avg}$ ) > 0.1 and correlation z-score p-value < 0.05 for the correlation between predicted and measured gene expression values

<sup>3</sup> Number of genes with  $h^2$  p-value < 0.05, the total number of genes with valid TWAS models

#### Abbreviations

AFR African ancestry

IAM Indigenous American ancestry

Pooled Analysis also includes participants self-identified as Other Latino

**Supplementary Table 15: Comparison of TWAS model performance with local ancestry (LA) adjustment.** Cross-validation  $R^2$  of gene expression prediction models with and without local ancestry adjustment. Comparisons were restricted to heritable genes with valid TWAS models.

| Population       | TWAS Models |             |              | CV $R^2$ |             |
|------------------|-------------|-------------|--------------|----------|-------------|
|                  | Original    | LA-adjusted | Intersection | Original | LA-Adjusted |
| Pooled (Total)   | 11830       | 11588       | 11497        | 0.161    | 0.154       |
| African American | 10090       | 9848        | 9701         | 0.186    | 0.177       |
| Puerto Rican     | 9611        | 9090        | 8959         | 0.173    | 0.156       |
| Mexican American | 9084        | 8582        | 8475         | 0.177    | 0.161       |

#### Abbreviations

AFR African ancestry

IAM Indigenous American ancestry

Pooled Analysis also includes participants self-identified as Other Latino
